# Supplementary material for: Rapid Detection of Plasmodium vivax by the Hematology Analyzer for Population Screening
Source: MDPI journal article supplement (doi:10.3390/diagnostics13223397), 2023-11-07
Supplement: s1 [file s1]

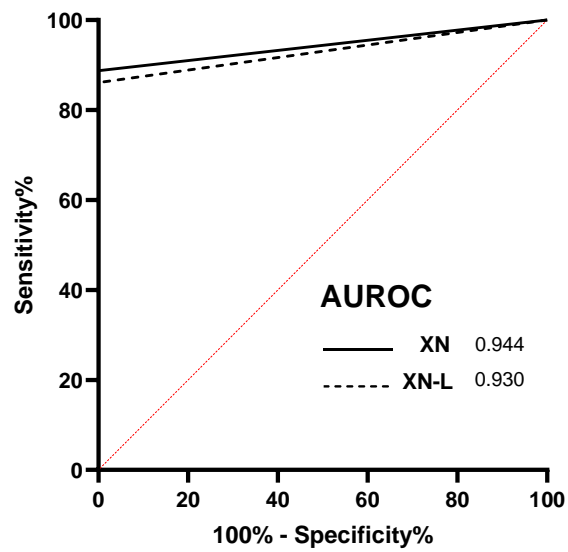

**Supplementary Figure S1.** Receiver operating characteristics curve to compare results of identifying malaria infected samples using the XN and XN-L instruments.
